# Supplementary material for: Study on the hydrothermal liquefaction of antibiotic residues with molecular sieve catalysts in the ethanol–water system: focus on product distribution and characterization
Source: Royal Society of Chemistry journal article supplement (doi:10.1039/d1ra03860e), 2021-01-01
Supplement: d1ra03860e1.pdf [file d1ra03860e1.pdf]

**Table S1 Characteristics of antibiotic residue**

|                    | Parameter             | Content |
|--------------------|-----------------------|---------|
| Proximate analysis | Volatile matter (wt%) | 75.26   |
|                    | Fixed carbon (wt%)    | 8.51    |
|                    | Ash (wt%)             | 7.32    |
|                    | Moisture(wt%)         | 8.91    |
| Ultimate analysis  | C (%)                 | 47.38   |
|                    | H (%)                 | 6.62    |
|                    | N (%)                 | 6.26    |
|                    | S(%)                  | 0.81    |
|                    | O <sup>①</sup> (%)    | 36.02   |

① Calculated by difference (100%-C%-H%-N%-S%-Ash%).

**Table S2 Properties of catalysts**

| Catalyst Type | Surface area, m <sup>2</sup> /g | Pore diameter, A <sup>0</sup> |
|---------------|---------------------------------|-------------------------------|
| HZSM-5        | 380                             | 5                             |

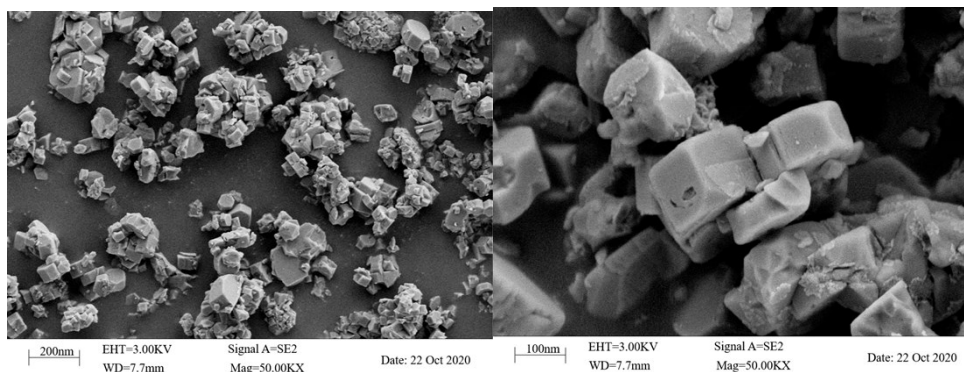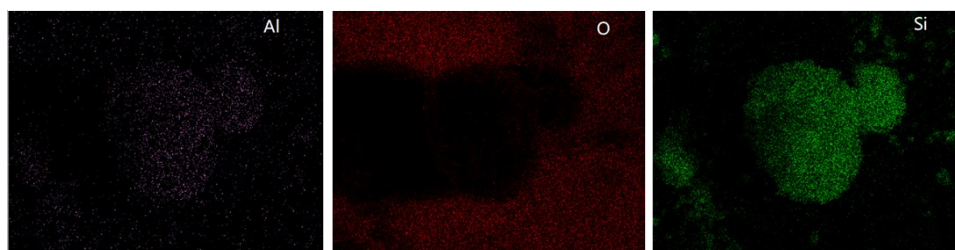

|                                          |      |     |
|------------------------------------------|------|-----|
| MCM-41                                   | 1000 | 3.6 |
| $\gamma$ -Al <sub>2</sub> O <sub>3</sub> | 320  | 12  |

**Fig. S1 Characterization of HZSM-5 molecular sieve by SEM and mapping**

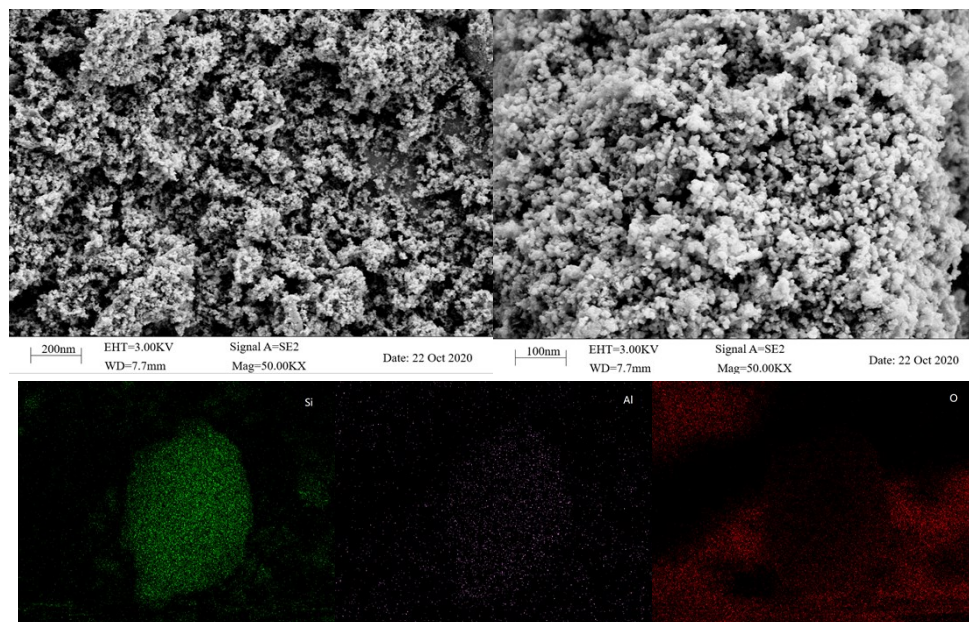

**Fig. S2 Characterization of MCM-41 molecular sieve by SEM and mapping**

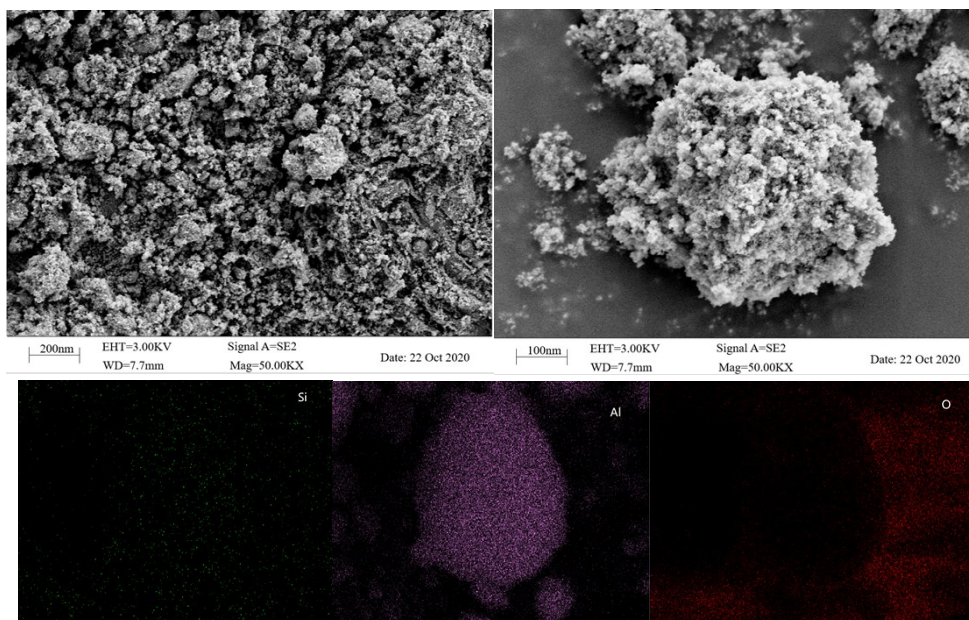

**Fig. S3 Characterization of  $\gamma$ -Al<sub>2</sub>O<sub>3</sub> molecular sieve by SEM and mapping**

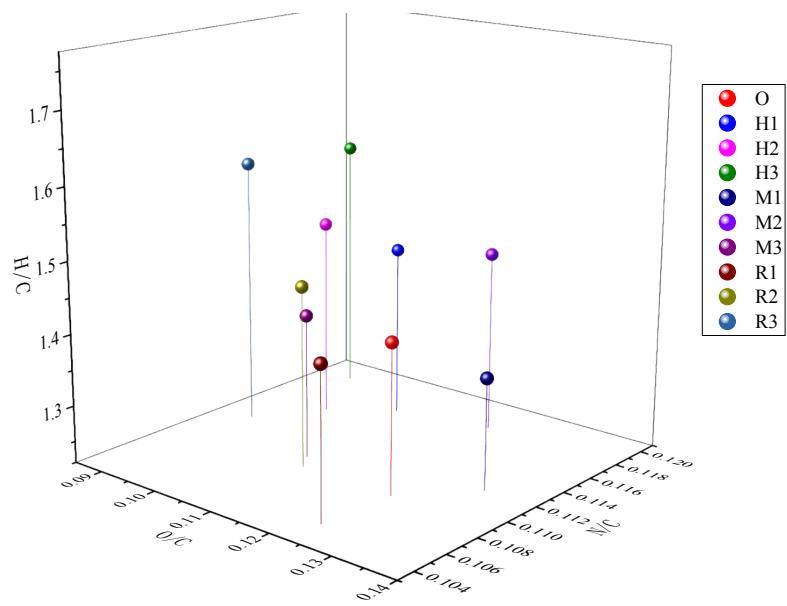

**Fig. S4 Van Krevelen diagram of bio-oil obtained**

**Table S3 chemical composition of bio-oil**

| Residence time (min) | Compounds                                                     | O    | H1   | H2   | H3   | M1    | M2    | M3    | R1    | R2    | R3    |
|----------------------|---------------------------------------------------------------|------|------|------|------|-------|-------|-------|-------|-------|-------|
| 2.24                 | Methane, nitroso-                                             | 0.29 | 1.79 | 1.8  | 2.3  | 3.7   | 1.03  | 0.83  | 1.13  | 1.3   | 0.78  |
| 15.91                | 2,5-Pyrrolidinedione, 1-ethyl-                                | 0.48 | 0.49 | 0.6  | 0.51 | 0.49  | 2.72  | 0.57  | 0.58  | 0.58  | 0.82  |
| 17.771               | 2-tetradecane, 5,7,13,15-tetramethyl-                         | -    | 0.21 | 1.06 | 1.76 | 0.12  | 0.43  | 0.96  | 0.33  | 0.56  | 0.7   |
| 18.835               | 2-hexadecene, 3,7,11,15-tetramethyl-                          | 0.92 | 1.33 | 1.47 | 1.72 | 3.12  | 4.23  | 2.11  | 2.52  | 3.72  | 2.12  |
| 21.78                | Indole                                                        | 0.54 | 0.47 | 0.47 | -    | -     | 0.43  | 0.38  | -     | -     | -     |
| 22.055               | Pyrazine, 2-ethyl-3-methyl-                                   | 0.67 | 0.42 | 0.37 | 0.2  | 0.55  | 1.17  | 0.71  | 0.55  | 0.85  | 0.79  |
| 24.615               | 2,5-Pyrrolidinedione, 1-butyl-                                | -    | -    | 0.6  | 0.3  | -     | 0.46  | 0.58  | -     | -     | -     |
| 28.89                | 2,4-Di-tert-butylphenol                                       | 1.11 | 0.62 | 0.79 | 0.96 | 0.68  | 0.82  | -     | 0.59  | 0.65  | 0.68  |
| 35.6                 | Decanoic acid, 2-phenylethyl ester                            | 0.71 | 0.54 | 0    | 1.13 | 0.63  | -     | -     | 0.61  | 0.58  | 0.62  |
| 38.04                | Cyclo(L-prolyl-L-valine)                                      | 0.87 | 3.54 | 2.58 | 1.9  | 3.52  | 2.35  | 1.76  | 1.79  | 2.47  | 2.51  |
| 40.46                | Pyrrolo[1,2-a]pyrazine-1,4-dione,hexahydro-3-(2-ethylpropyl)- | 0.52 | 3.4  | 1.53 | 4.57 | 6.26  | 4.12  | 1.33  | 1.02  | 5.2   | 5.33  |
| 40.8                 | Dibutyl phthalate                                             | 0.52 | 0    | 0.59 | 0.49 | 0.74  | 0.75  | 0.69  | 1.48  | 0.59  | 0.55  |
| 41.37                | n-He0adecanoic acid                                           | 2.67 | 0.82 | 0.93 | 1.22 | 0.68  | 0.53  | 0.66  | 1.36  | 1.16  | 1.08  |
| 41.925               | He0adecanoic acid, ethyl ester                                | 6.79 | 6.83 | 6.81 | 6.61 | 6.81  | 6.89  | 7.26  | 6.24  | 5.89  | 5.26  |
| 45.295               | 10(E),12(Z)-Conjugated linoleic acid                          | 5.85 | 1.77 | -    | -    | 0.57  | 0.29  | 1.67  | -     | -     | 0.54  |
| 45.47                | 9,12-Octadecadienoic acid (Z,Z)-                              | 4.53 | 4.61 | 6.3  | 4.93 | 3.06  | 2.15  | 4.7   | 7.69  | 6.73  | 10.45 |
| 46.06                | Linoleic acid ethyl ester                                     | 28   | 36   | 26   | 23   | 35.39 | 31.77 | 36.48 | 33.69 | 31.87 | 32.36 |
| 46.5                 | Octadecanoic acid, ethyl ester                                | 1.09 | 1.12 | 6.81 | 1.07 | 1.1   | 1.06  | 1.19  | 1.06  | 1.04  | 0.98  |
| 47.7                 | 2,5-Piperazinedione, 3-benzyl-6-isopropyl-                    | 0.75 | 1.94 | 3.69 | 1.14 | 2.78  | 3.54  | 2.11  | 2.1   | 3.4   | 2.32  |
| 47.76                | 9(E),11(E)-Conjugated linoleic acid, ethyl ester              | 2.5  | -    | 2.62 | 2.69 | -     | 2.68  | 1.1   | -     | 2.29  | 2.08  |
| 49.1                 | Pyrrolo[1,2-a]pyrazine-1,4-dione, he0ahydro-3-(phenylmethyl)- | 1.52 | 0.65 | 1.22 | 2.3  | 1.01  | 0.94  | 0.73  | 0.7   | 1.19  | 1     |
| 49.78                | 9,12-Octadecadienoic acid, methyl ester                       | 1.83 | 1.91 | 2.05 | 2.18 | 1.78  | 2.12  | 2.16  | 1.85  | 1.85  | 1.97  |

|        |                                                      |       |      |      |      |      |      |      |      |      |      |
|--------|------------------------------------------------------|-------|------|------|------|------|------|------|------|------|------|
| 50.075 | 13-Tetradec-11-yn-1-ol                               | 0.89  | 0.87 | 2    | 2.27 | 0.73 | 0.99 | 1.1  | 0.78 | 0.73 | 0.78 |
| 51.615 | Propanamide, 3-cyclopentyl-N-ethyl-                  | 1.36  | 4.79 | 2.12 | 1.5  | 0.62 | 2.9  | 0.91 | 1.85 | 1.88 | 1.02 |
| 58.25  | Eicosanoic acid, ethyl ester                         | 0.59  | 0.66 | 0.65 | 0.58 | 1.29 | 0.42 | 0.62 | 0.63 | 1.03 | 0.69 |
| 60.825 | 3.alpha.,5-Cyclo-5.alpha.-ergosta-6,8(14).22t-triene | 0.72  | 0.83 | 0.9  | 0.56 | 1.03 | 0.62 | 1    | 0.99 | 1.02 | 1.12 |
| 63.95  | 8(14),22-Ergostadienol                               | 0.75  | 0.85 | 0.81 | 0.49 | 0.94 | 0.71 | 1.03 | 0.89 | 0.83 | 1.37 |
| 64.925 | Neoergosterol                                        | 4.61  | 4.75 | 4.75 | 4.24 | 4.93 | 4.57 | 5.5  | 5.09 | 5.15 | 5.88 |
| 65.47  | 4-[9,10-Dihydrophenanthren-2-yl]-n-butanol           | 0.621 | 0.7  | 0.68 | 0.61 | 0.63 | 0.41 | 0.64 | 0.5  | 0.69 | 0.76 |
| 66.25  | .gamma.-Sitosterol                                   | 3.11  | 3.41 | 3.6  | 3.46 | 3.86 | 3.19 | 3.99 | 3.95 | 4.07 | 4.02 |
| 66.9   | Anthraergostatetraenol                               | 1.65  | 1.85 | 1.75 | 2.02 | 1.87 | 1.75 | 2.13 | 2.01 | 1.3  | 2    |

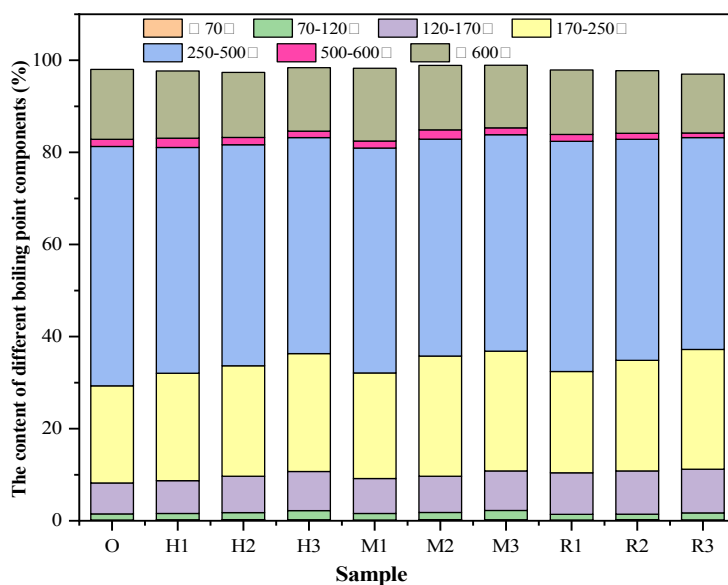

**Fig.S5 Boiling range of fraction**

**Table S4 Percentage of H distribution from <sup>1</sup>H NMR spectra of the bio-oil**

| Sample | Chemical shift (Content w / %) |                      |                      |                      |                      |
|--------|--------------------------------|----------------------|----------------------|----------------------|----------------------|
|        | $\delta=0.5\sim 1.5$           | $\delta=1.5\sim 4.0$ | $\delta=3.0\sim 4.4$ | $\delta=4.4\sim 6.0$ | $\delta=6.0\sim 8.5$ |
| O      | 61.42                          | 22.33                | 1.33                 | 8.8                  | 6.12                 |
| H1     | 69.33                          | 16.21                | 0.94                 | 6.09                 | 7.43                 |
| H2     | 75.14                          | 10.12                | 0.85                 | 5.12                 | 8.77                 |
| H3     | 82.21                          | 7.32                 | 0.71                 | 0.05                 | 9.31                 |
| M1     | 62.35                          | 19.05                | 1.02                 | 11.57                | 6.01                 |
| M2     | 73.77                          | 12.37                | 0.89                 | 7.25                 | 5.72                 |
| M3     | 79.69                          | 10.33                | 0.80                 | 3.63                 | 5.55                 |
| R1     | 70.01                          | 17.21                | 0.92                 | 5.42                 | 6.44                 |
| R2     | 77.31                          | 12.98                | 0.79                 | 1.94                 | 6.98                 |
| R3     | 84.7                           | 7.3                  | 0.71                 | 0.57                 | 6.72                 |
